# Supplementary material for: A flexible symmetric sodium full cell constructed using the bipolar material Na3V2(PO4)3
Source: Royal Society of Chemistry journal article supplement (doi:10.1039/c7ta01477e), 2017-01-01
Supplement: c7ta01477e1.pdf [file c7ta01477e1.pdf]

## Supporting Information

### A Flexible Symmetric Sodium Full Cell Constructed Using the Bipolar Material $\text{Na}_3\text{V}_2(\text{PO}_4)_3$

Wei Wang, Qunjie Xu, Haimei Liu\*, Yonggang Wang\*, Yongyao Xia

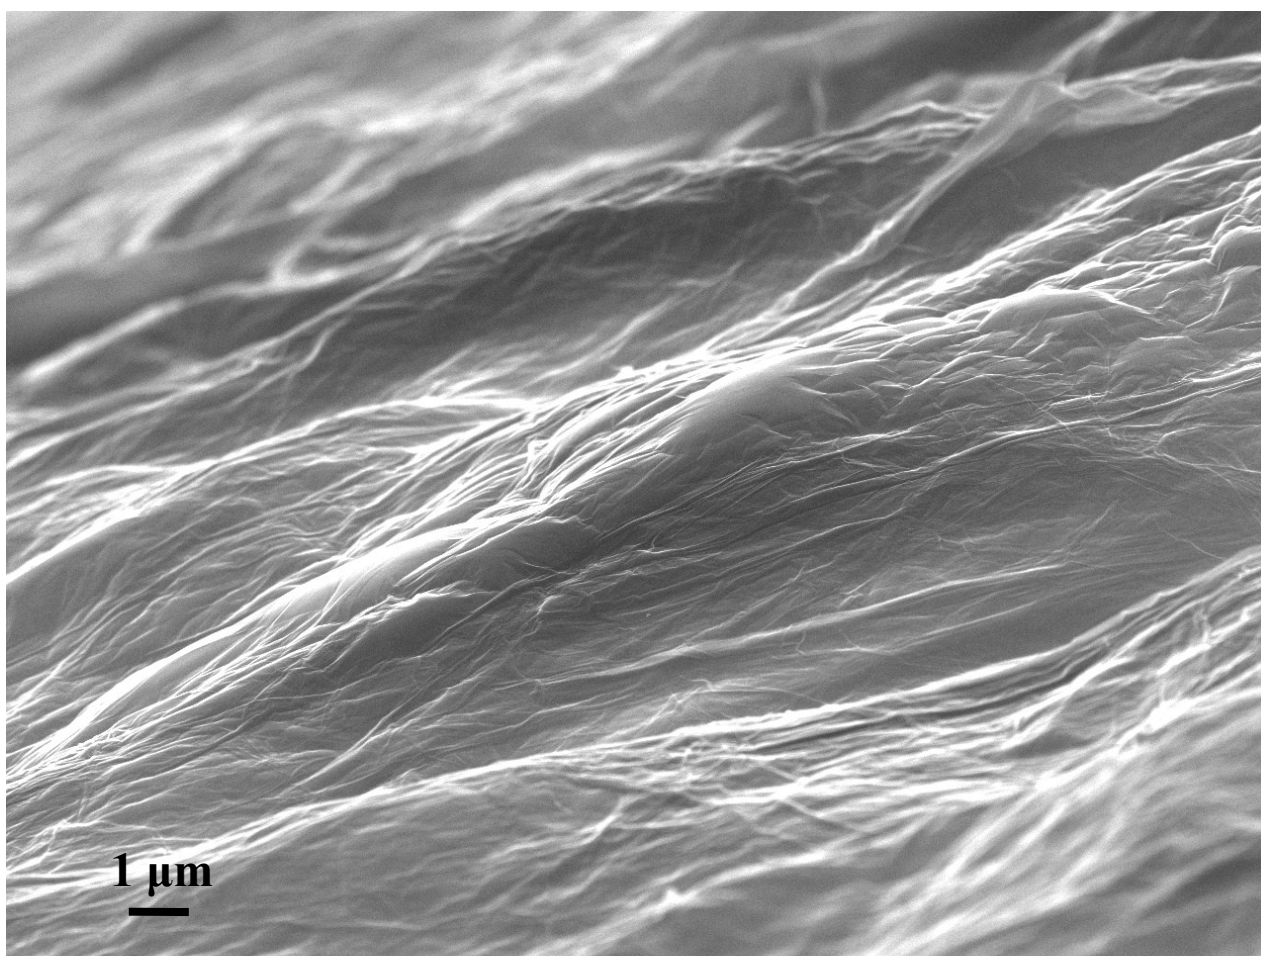

**Fig. S1.** SEM picture of rGO

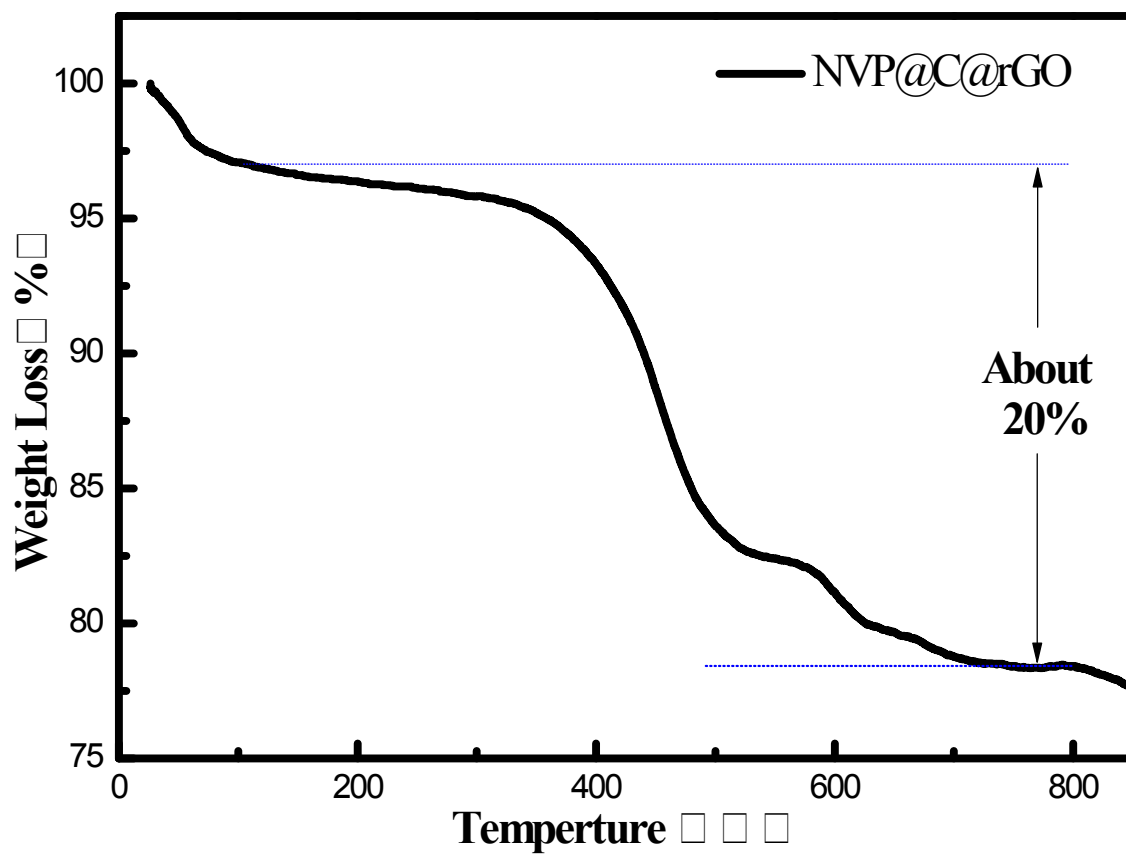

Fig. S2.TG curve for the NVP@C@rGO electrode obtained at a heating rate of  $10\text{ }^{\circ}\text{C min}^{-1}$  in flowing air.

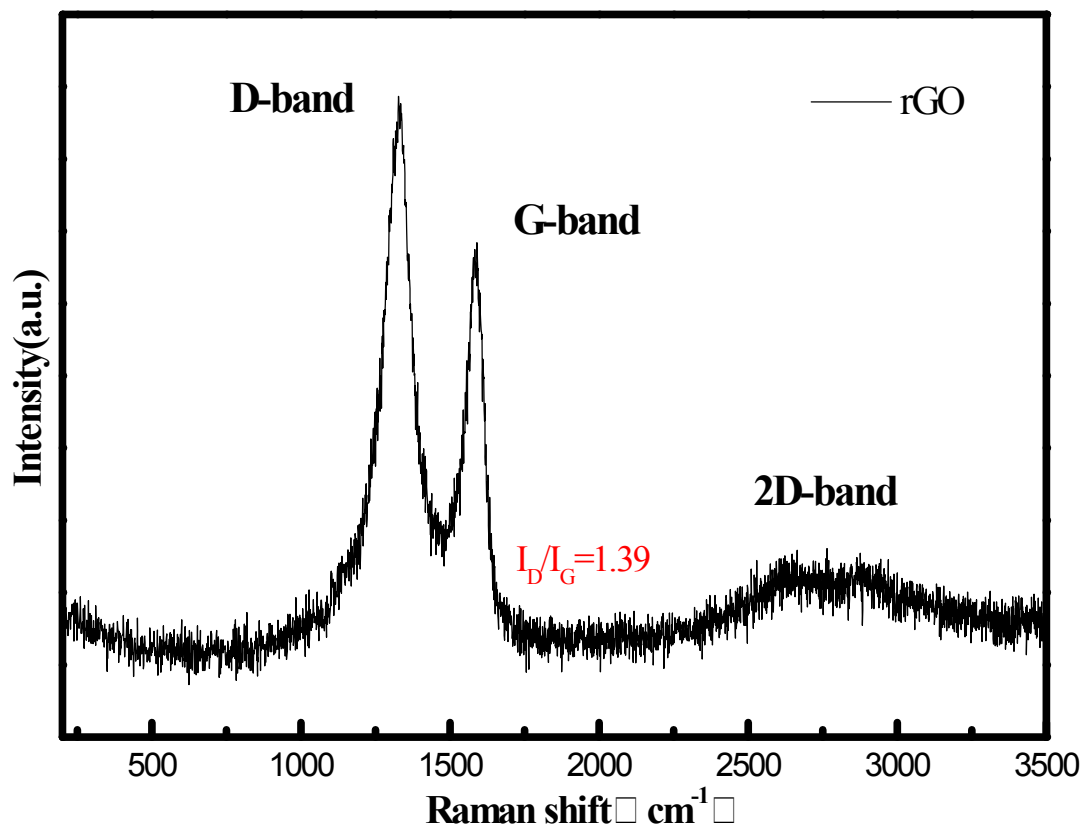

Fig. S3. Raman spectrum of rGO

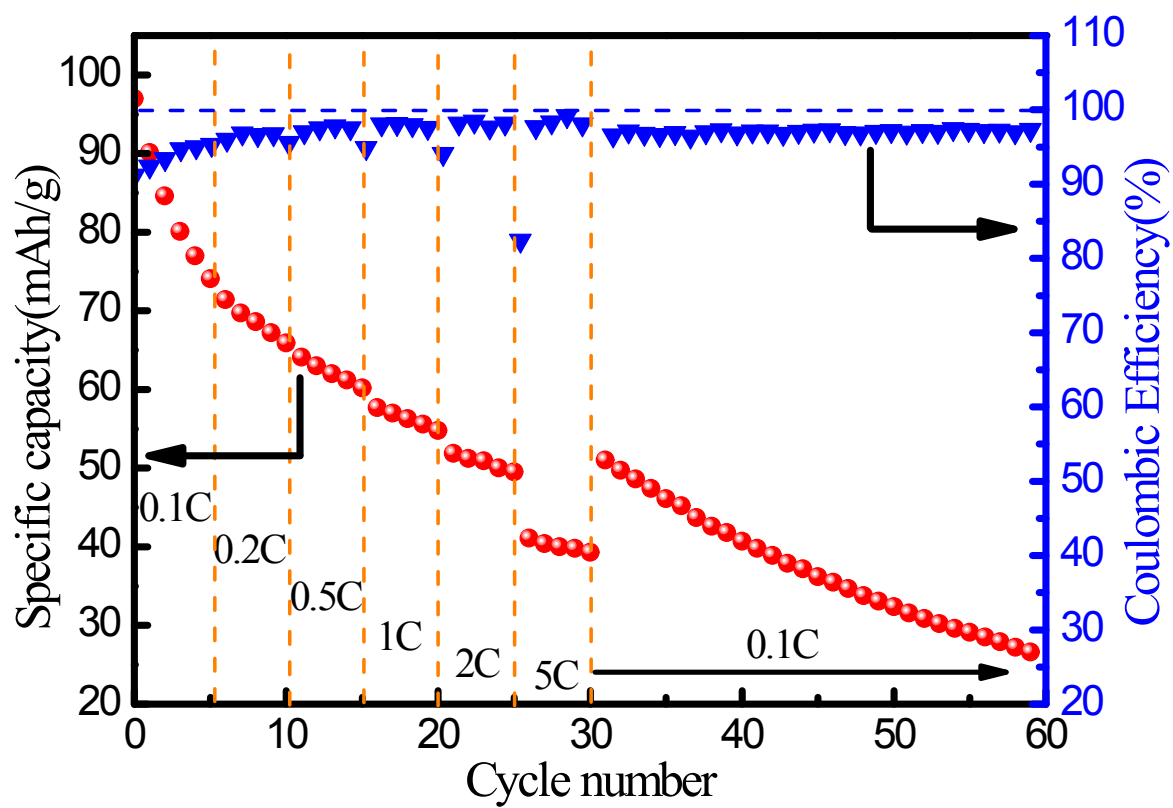

**Fig. S4.** Electrochemical performances of NVP/NVP full cell limited by cathode in the potential range of 1.2-2.2 V.
